# Supplementary material for: Machine Learning Maps Research Needs in COVID-19 Literature
Source: bioRxiv or medRxiv preprint supplement (doi:10.1101/2020.06.11.145425), 2020-06-12
Supplement: Supplementary file [file media-4.pdf]

***Supplemental Information 4. Distribution of the Top 50 Key Terms Separating COVID-19 Abstracts from non-COVID-19 Abstracts along Principal Component 2 (shown in Figure 3)***

| <b>Lemmatized Word</b> | <b>Component Value</b> | <b>Percentage of COVID-19 Abstracts</b> | <b>Percentage of non-COVID-19 Abstracts</b> |
|------------------------|------------------------|-----------------------------------------|---------------------------------------------|
| patient                | -0.20184               | 51.3                                    | 26.7                                        |
| covid                  | -0.19725               | 99.8                                    | 6.1                                         |
| case                   | -0.13793               | 34.9                                    | 20.1                                        |
| hospit                 | -0.09987               | 18.9                                    | 10.8                                        |
| pandem                 | -0.08412               | 44.4                                    | 9.7                                         |
| risk                   | -0.07939               | 21.2                                    | 9.1                                         |
| care                   | -0.0786                | 16.6                                    | 5.8                                         |
| epidem                 | -0.07234               | 16.1                                    | 10.4                                        |
| countri                | -0.07022               | 16.7                                    | 7.6                                         |
| sever                  | -0.06779               | 22.9                                    | 12.8                                        |
| manag                  | -0.06461               | 15.5                                    | 5.6                                         |
| estim                  | -0.06186               | 8.9                                     | 4.5                                         |
| death                  | -0.06158               | 13.8                                    | 7                                           |
| number                 | -0.06069               | 18.8                                    | 10.8                                        |

|             |          |      |      |
|-------------|----------|------|------|
| function    | 0.060604 | 4.8  | 10.1 |
| specif      | 0.06181  | 12.8 | 18.9 |
| mice        | 0.062183 | 0.4  | 4.5  |
| tgev        | 0.06324  | 0    | 2.6  |
| amino_acid  | 0.063691 | 0.6  | 5.1  |
| inhibit     | 0.063901 | 2    | 6.6  |
| activ       | 0.064333 | 10.1 | 14.2 |
| coronavirus | 0.065021 | 43.3 | 67.1 |
| assay       | 0.069902 | 2.3  | 10   |
| induc       | 0.070871 | 2.7  | 9.1  |
| host        | 0.071237 | 2.7  | 8.2  |
| target      | 0.072913 | 5.9  | 10.5 |
| receptor    | 0.07325  | 2.7  | 5.4  |
| interact    | 0.07327  | 3.9  | 7.3  |
| domain      | 0.073451 | 1.6  | 6    |
| antigen     | 0.075788 | 1    | 8.4  |
| hcov        | 0.076117 | 0.4  | 3.5  |

|               |          |      |      |
|---------------|----------|------|------|
| spike_protein | 0.078466 | 1.5  | 6.1  |
| recombin      | 0.079413 | 0.6  | 6    |
| replic        | 0.082887 | 1.5  | 8.5  |
| strain        | 0.085891 | 2.5  | 11.3 |
| genom         | 0.094031 | 2.2  | 10.3 |
| vaccin        | 0.097755 | 6.2  | 10.5 |
| bind          | 0.099378 | 2.3  | 7.3  |
| antibodi      | 0.100884 | 2.9  | 10.5 |
| structur      | 0.103286 | 4.3  | 11.2 |
| sequenc       | 0.104208 | 2.4  | 13   |
| gene          | 0.108125 | 1.6  | 10.8 |
| viral         | 0.10938  | 12.2 | 27.9 |
| human         | 0.119375 | 11.5 | 24.6 |
| express       | 0.119808 | 3.2  | 11.3 |
| mer           | 0.134674 | 3.6  | 10.6 |
| virus         | 0.164846 | 22.2 | 51.8 |
| sar           | 0.165963 | 37.4 | 41.7 |

|         |          |     |      |
|---------|----------|-----|------|
| cell    | 0.228506 | 6.3 | 21   |
| protein | 0.378095 | 4.1 | 21.3 |
