# Supplementary material for: Machine Learning Maps Research Needs in COVID-19 Literature
Source: bioRxiv or medRxiv preprint supplement (doi:10.1101/2020.06.11.145425), 2020-06-12
Supplement: Supplementary file [file media-5.pdf]

**Supplemental Information 5. Examples of Abstracts Identified as Either COVID-19 or non-COVID related**

| <b>Relationship with COVID-19</b>                                             | <b>Abstract Title</b>                                                                                                                                                       |
|-------------------------------------------------------------------------------|-----------------------------------------------------------------------------------------------------------------------------------------------------------------------------|
| <p>Related to COVID-19<br/><br/>(Bottom 1% of Second Principal Component)</p> | <p>Recommendations for standardized management of CML patients in the core epidemic area of COVID-19 (Wang et al., 2020c)</p>                                               |
|                                                                               | <p>Transmission risk of patients with COVID-19 meeting discharge criteria should be interpreted with caution (Su, 2020)</p>                                                 |
|                                                                               | <p>COVID-19 in a Designated Infectious Diseases Hospital Outside Hubei Province, China (Cai, 2020)</p>                                                                      |
| <p>Unrelated to COVID-19<br/><br/>(Top 1% of Second Principal Component)</p>  | <p>Characterization of the expression and immunogenicity of the ns4b protein of human coronavirus 229E. (Chagnon, 1998)</p>                                                 |
|                                                                               | <p>Severe acute respiratory syndrome coronavirus nucleocapsid protein expressed by an adenovirus vector is phosphorylated and immunogenic in mice. (Zakhartchouk, 2005)</p> |
|                                                                               | <p>Molecular cloning and expression of a spike protein of neurovirulent murine coronavirus JHMV variant cl-2. (Taguchi, 1992)</p>                                           |
