# Supplementary material for: Machine Learning Maps Research Needs in COVID-19 Literature
Source: bioRxiv or medRxiv preprint supplement (doi:10.1101/2020.06.11.145425), 2020-06-12
Supplement: Supplementary file [file media-6.pdf]

*Supplemental Information 6. Topic Families Across COVID-19 and non-COVID-19 Abstracts*

| <b>ID</b> | <b>Topic Title</b>                             | <b>Topic Family</b>                         | <b>COVID-19 Count (percent)</b> | <b>Total (percent)</b> |
|-----------|------------------------------------------------|---------------------------------------------|---------------------------------|------------------------|
| 1         | Treatment and patient care for COVID-19        | Vaccine needs, patient care, and treatments | 250 (1.4%)                      | 338 (1%)               |
| 2         | Biomolecular study of coronaviruses            | Microbiology (general)                      | 287 (1.6%)                      | 3165 (9%)              |
| 3         | Infection by coronavirus                       | Microbiology (transmission)                 | 149 (0.8%)                      | 311 (0.9%)             |
| 4         | Porcine coronavirus microbiology and infection | Microbiology (general)                      | 37 (0.2%)                       | 199 (0.6%)             |
| 5         | Infection by coronavirus                       | Microbiology (transmission)                 | 226 (1.2%)                      | 1695 (4.8%)            |
| 6         | Public health issues of SARS transmission      | Outbreaks (public health)                   | 305 (1.7%)                      | 1274 (3.6%)            |
| 7         | Outbreaks in different countries               | Outbreaks (general coverage)                | 231 (1.3%)                      | 336 (1%)               |
| 8         | Death and mortality due to COVID-19            | Outbreaks (general coverage)                | 226 (1.2%)                      | 284 (0.8%)             |
| 9         | Human infection by coronaviruses               | Microbiology (transmission)                 | 430 (2.3%)                      | 911 (2.6%)             |
| 10        | Testing and infection of COVID-19              | Testing (mixed with transmission)           | 210 (1.1%)                      | 321 (0.9%)             |
| 11        | Impact of COVID-19 on community services       | Outbreaks (general coverage)                | 125 (0.7%)                      | 208 (0.6%)             |
| 12        | Infection by MERS-CoV                          | Microbiology (transmission)                 | 36 (0.2%)                       | 660 (1.9%)             |

|    |                                                     |                                             |              |             |
|----|-----------------------------------------------------|---------------------------------------------|--------------|-------------|
| 13 | General COVID-19 pandemic coverage                  | Outbreaks (general coverage)                | 432 (2.3%)   | 498 (1.4%)  |
| 14 | COVID-19's impact on healthcare services            | Outbreaks (public health)                   | 2666 (14.5%) | 3050 (8.6%) |
| 15 | Clinical testing and COVID-19 symptoms              | Testing                                     | 1750 (9.5%)  | 2201 (6.2%) |
| 16 | Transmission and infection among coronaviruses      | Microbiology (transmission)                 | 980 (5.3%)   | 1903 (5.4%) |
| 17 | Modeling, statistics, and investigation of epidemic | Outbreaks (general coverage)                | 2006 (10.9%) | 2580 (7.3%) |
| 18 | Drug studies and need for vaccines                  | Vaccine needs, patient care, and treatments | 837 (4.5%)   | 1214 (3.4%) |
| 19 | Study of coronavirus genomes                        | Microbiology (general)                      | 201 (1.1%)   | 1054 (3%)   |
| 20 | Biomolecular study of coronaviruses                 | Microbiology (general)                      | 123 (0.7%)   | 2931 (8.3%) |
| 21 | Treatment and patient care for coronaviruses        | Vaccine needs, patient care, and treatments | 2234 (12.1%) | 2958 (8.4%) |
| 22 | Children infected by COVID-19                       | Outbreaks (general coverage)                | 125 (0.7%)   | 216 (0.6%)  |
| 23 | Clinical testing for COVID-19                       | Testing                                     | 475 (2.6%)   | 767 (2.2%)  |
| 24 | COVID-19 cases and deaths reported                  | Outbreaks (general coverage)                | 1190 (6.5%)  | 1408 (4%)   |
| 25 | Lessons learned for epidemic preparedness           | Outbreaks (public health)                   | 2038 (11.1%) | 2801 (7.9%) |

|    |                                                 |                                   |            |             |
|----|-------------------------------------------------|-----------------------------------|------------|-------------|
| 26 | Outbreak and public health response to COVID-19 | Outbreaks (public health)         | 138 (0.7%) | 221 (0.6%)  |
| 27 | Biomolecular study of coronaviruses             | Microbiology (general)            | 56 (0.3%)  | 89 (0.3%)   |
| 28 | Testing and transmission of COVID-19            | Testing (mixed with transmission) | 121 (0.7%) | 296 (0.8%)  |
| 29 | Biomolecular study of coronavirus strains       | Microbiology (general)            | 51 (0.3%)  | 191 (0.5%)  |
| 30 | Outbreaks and public health responses           | Outbreaks (public health)         | 477 (2.6%) | 1200 (3.4%) |
